# Supplementary material for: In situformation of Cu2O decorated CuZnAl-layered double hydroxide heterostructured photocatalysts for enhancing the degradation of tetracycline under visible light
Source: Royal Society of Chemistry journal article supplement (doi:10.1039/d2nj04564h), 2022-12-22
Supplement: d2nj04564h1.pdf [file d2nj04564h1.pdf]

## Supporting Information

### In-situ formation of Cu<sub>2</sub>O decorated CuZnAl-layered double hydroxides heterostructured photocatalysts for enhancing degradation of tetracycline under visible light

Xiangkun Ran<sup>a</sup>, Tian Sun<sup>a</sup>, Runze Zhou<sup>a</sup>, Chaojun Wei<sup>a</sup>, Wa Gao<sup>ab\*</sup>, Hanqing Zhao<sup>a\*</sup>

*a Key Laboratory for Northern Urban Agriculture of Ministry of Agriculture and Rural Affairs, College of Bioscience and Resources Environment, Beijing University of Agriculture, Beijing 102206, China*

*b Beijing Key Laboratory of Detection and Control of Spoilage Microorganisms and Pesticide Residues in Agricultural Products, Beijing University of Agriculture, Beijing 102206, China*

#### \*Corresponding authors

E-mails: [gaowa@bua.edu.cn](mailto:gaowa@bua.edu.cn) (W. Gao), [zhaohanqingbua@163.com](mailto:zhaohanqingbua@163.com) (H. Zhao)

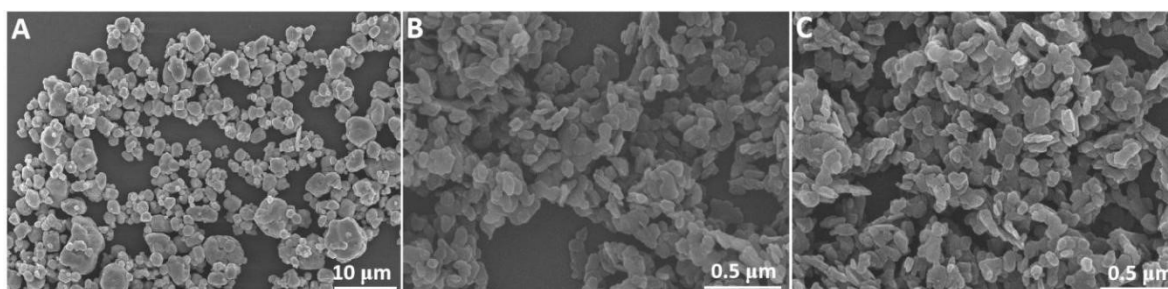

**Fig. S1** (A) SEM images of Cu<sub>2</sub>O, (B) as-synthesized CuZnAl-LDHs and (C) Cu<sub>2</sub>O/CuZnAl-LDHs.

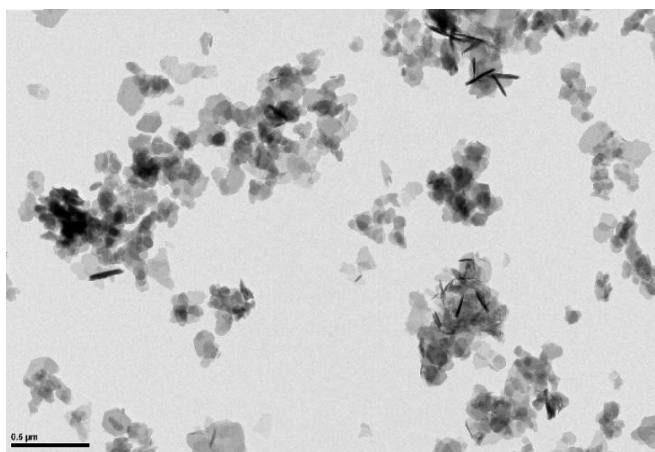

**Fig. S2** TEM images of as-synthesized CuZnAl-LDHs.

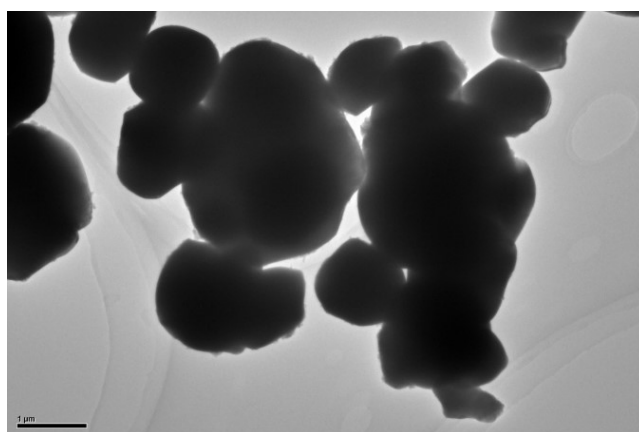

**Fig. S3** TEM image of Cu<sub>2</sub>O sample.

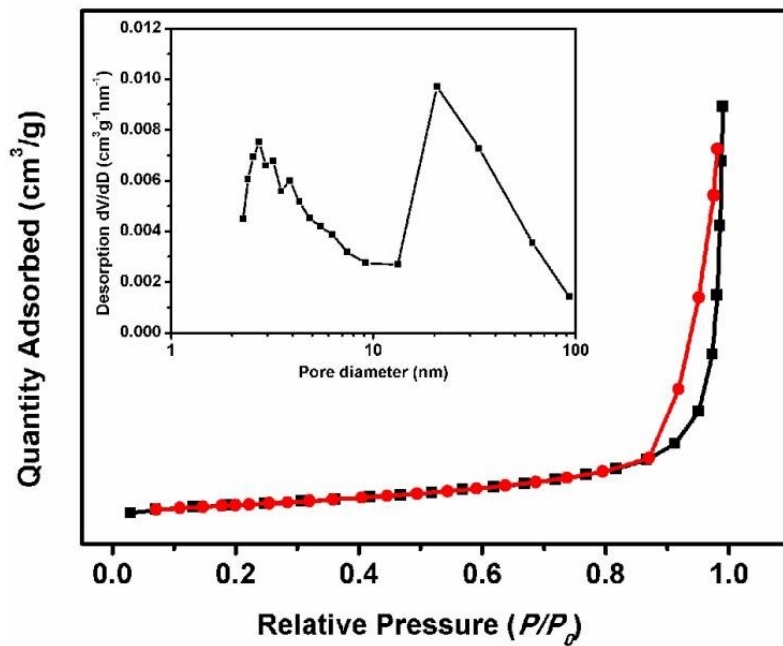

**Fig. S4** N<sub>2</sub> adsorption-desorption isotherms and corresponding pore size distribution curves (inset) of CuZnAl-LDHs.

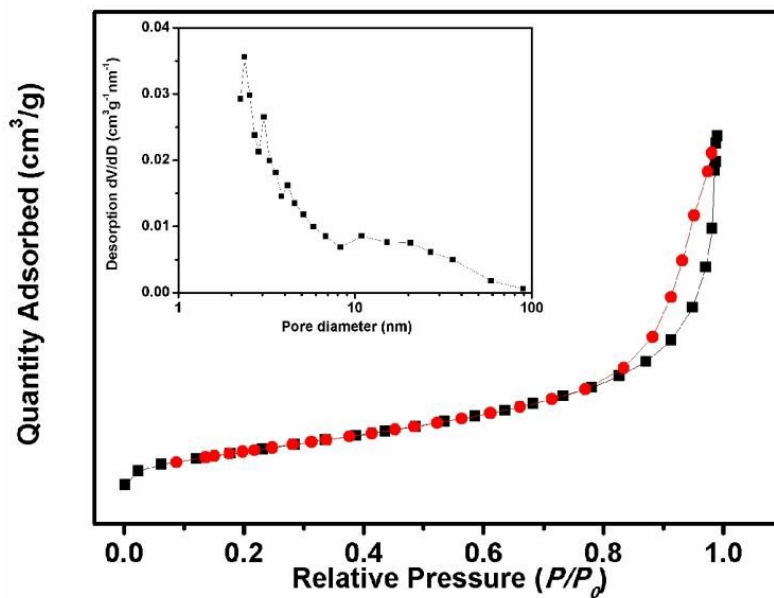

**Fig. S5** N<sub>2</sub> adsorption-desorption isotherms and corresponding pore size distribution curves (inset) of Cu<sub>2</sub>O.

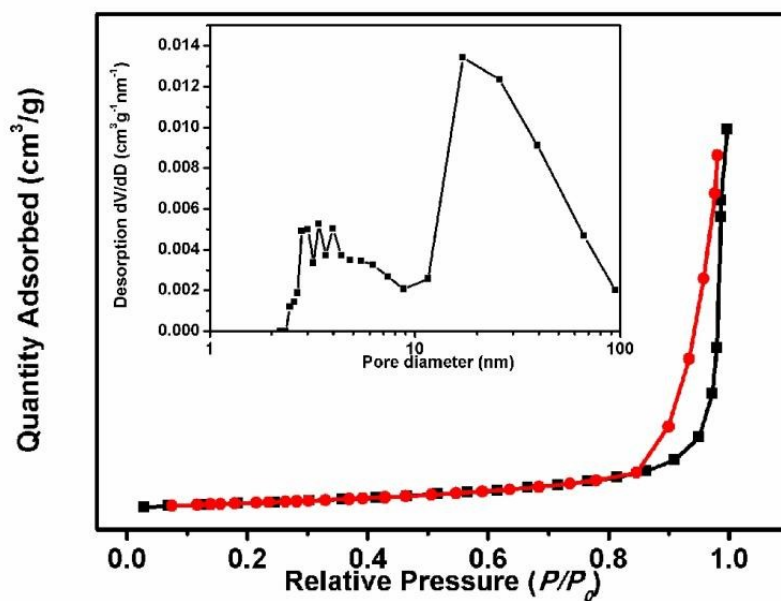

**Fig. S6** N<sub>2</sub> adsorption-desorption isotherms and corresponding pore size distribution curves (inset) of Cu<sub>2</sub>O/CuZnAl-LDHs.

**Table S1** BET results for CuZnAl-LDHs, Cu<sub>2</sub>O, and Cu<sub>2</sub>O/CuZnAl-LDHs catalysts.

| Sample                        | BET surface area<br>(m <sup>2</sup> g <sup>-1</sup> ) | Pore volume<br>(cm <sup>3</sup> g <sup>-1</sup> ) | Average pore size<br>(nm) |
|-------------------------------|-------------------------------------------------------|---------------------------------------------------|---------------------------|
| CuZnAl-LDHs                   | 95.4                                                  | 0.54                                              | 18.42                     |
| Cu <sub>2</sub> O             | 26.2                                                  | 0.065                                             | 7.43                      |
| Cu <sub>2</sub> O/CuZnAl-LDHs | 89.6                                                  | 0.38                                              | 14.57                     |

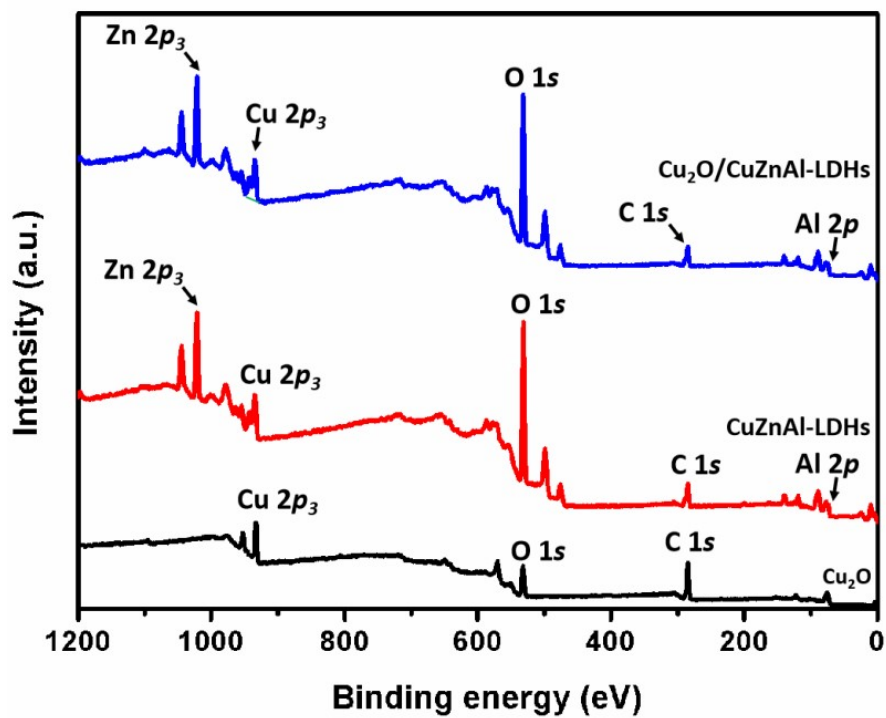

Fig. S7 XPS survey spectra of all elements.

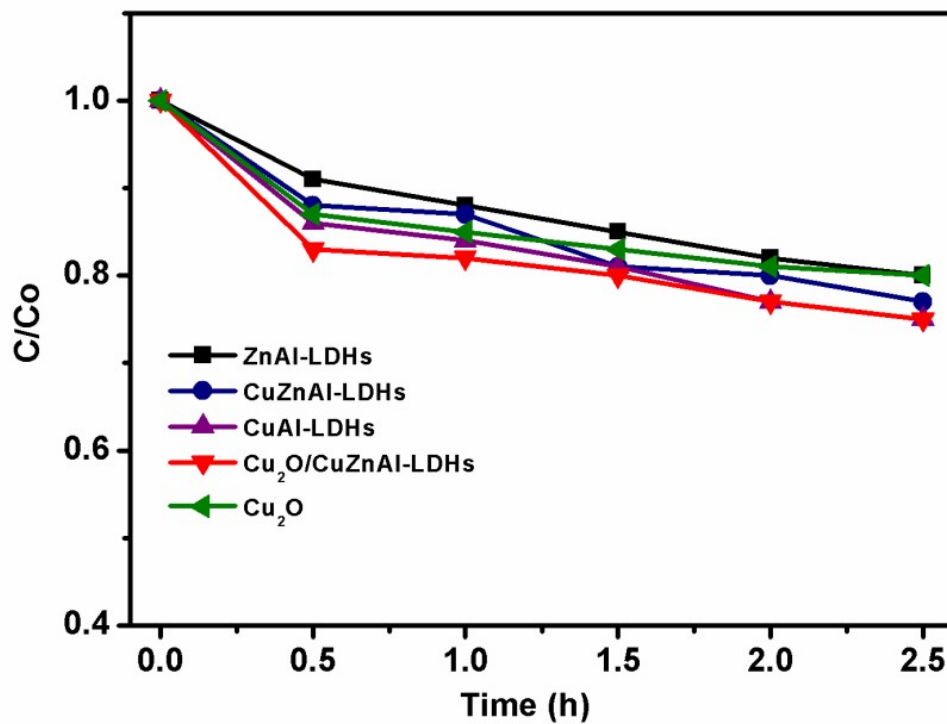

Fig. S8 Adsorption capacity of Cu<sub>2</sub>O/CuZnAl-LDHs heterojunction photocatalysts.

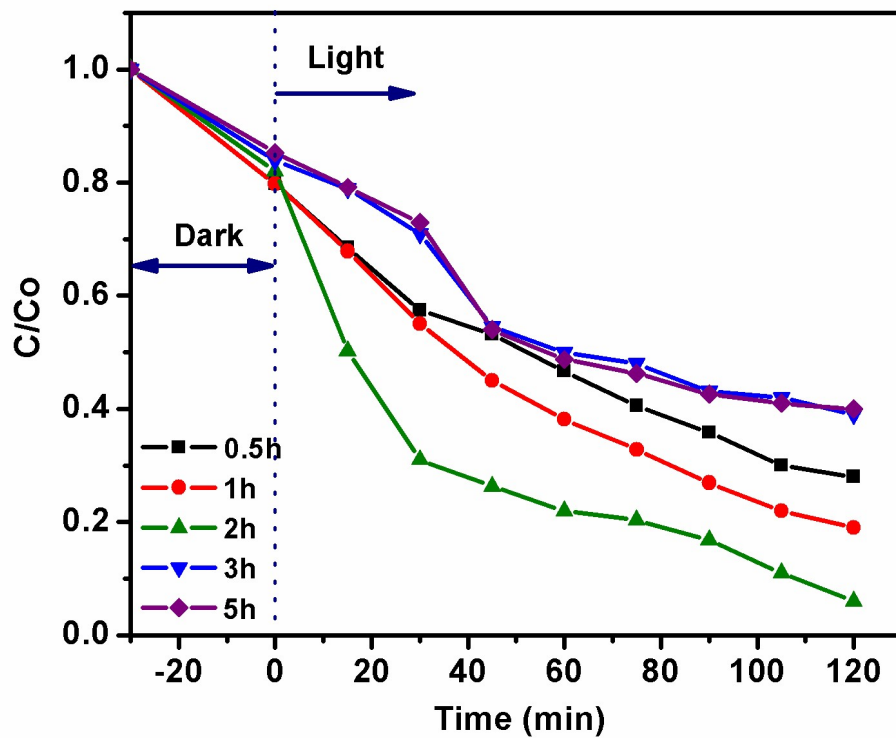

Fig. S9 Effects of ascorbic acid reduction time on  $\text{Cu}_2\text{O}/\text{CuZnAl-LDHs}$  system for TC degradation.

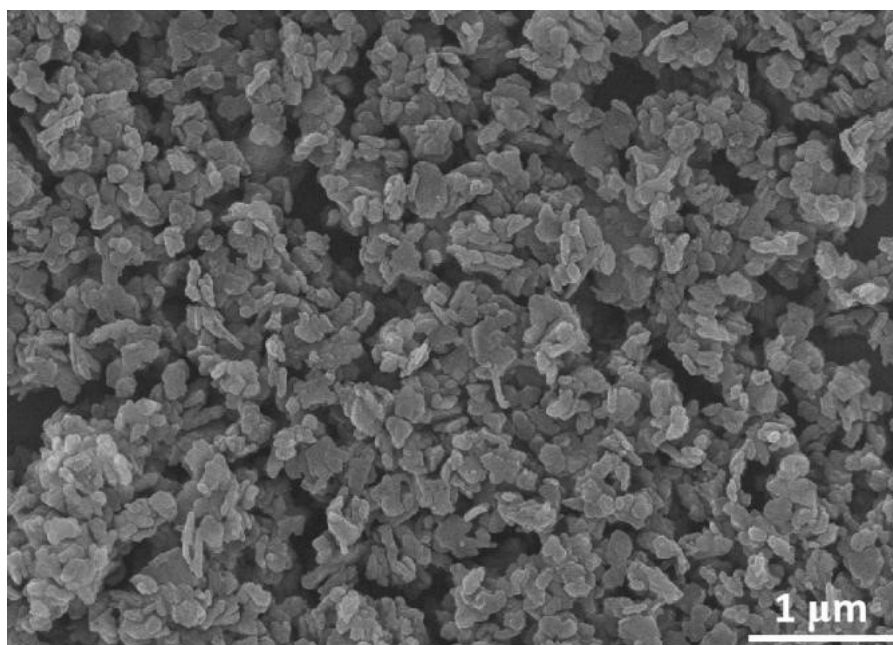

Fig. S10 SEM image of the used  $\text{Cu}_2\text{O}/\text{CuZnAl-LDHs}$  catalyst.

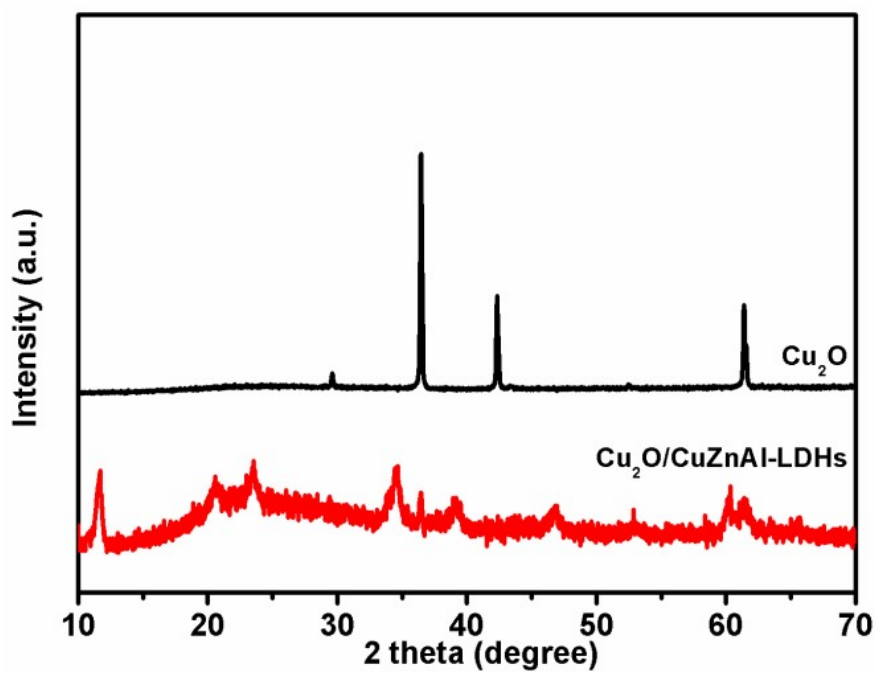

Fig. S11 The XRD spectra of the used  $\text{Cu}_2\text{O}/\text{CuZnAl-LDHs}$  catalyst.

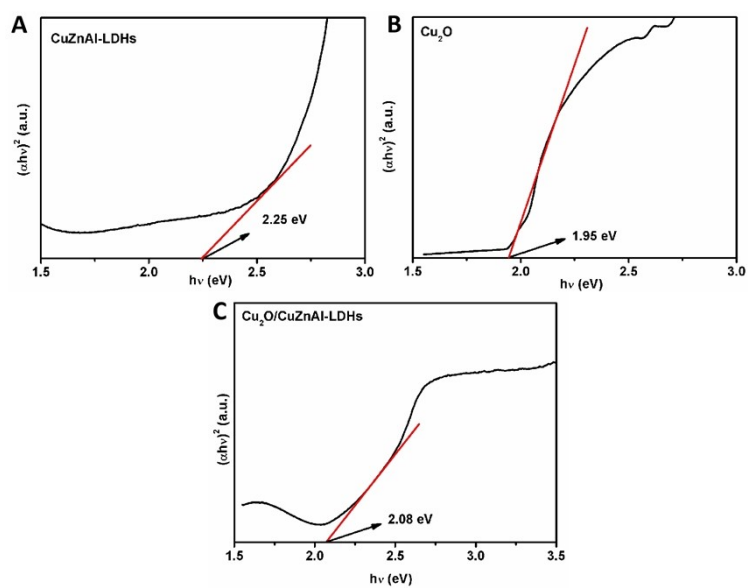

Fig. S12 Kubelka-Munk plots for  $\text{CuZnAl-LDHs}$ ,  $\text{Cu}_2\text{O}$ , and  $\text{Cu}_2\text{O}/\text{CuZnAl-LDHs}$ .

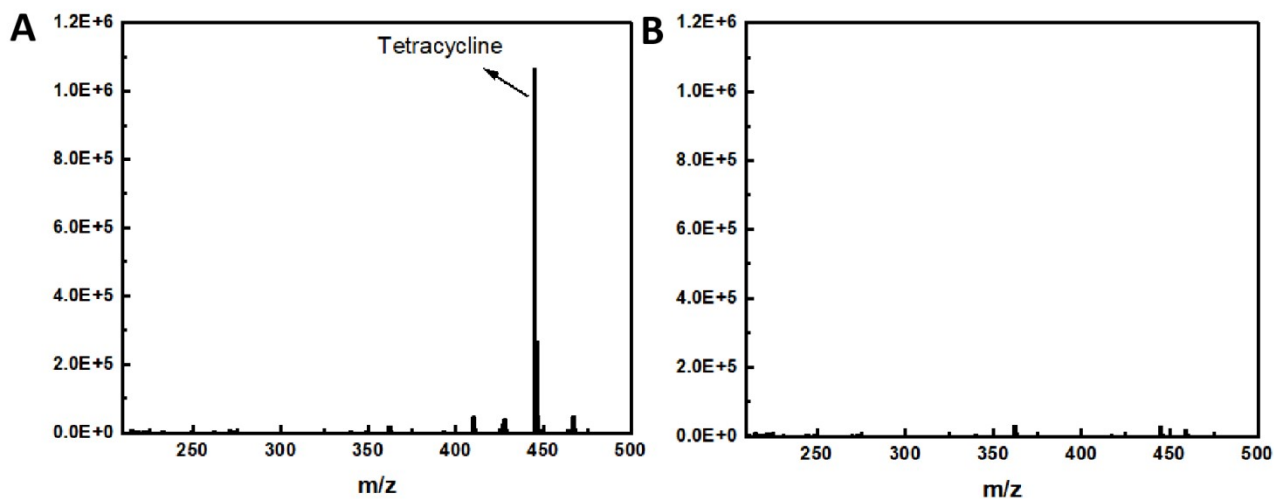

**Fig. S13** The HPLC-MS spectra before and after photodegradation of tetracycline for 2 h.



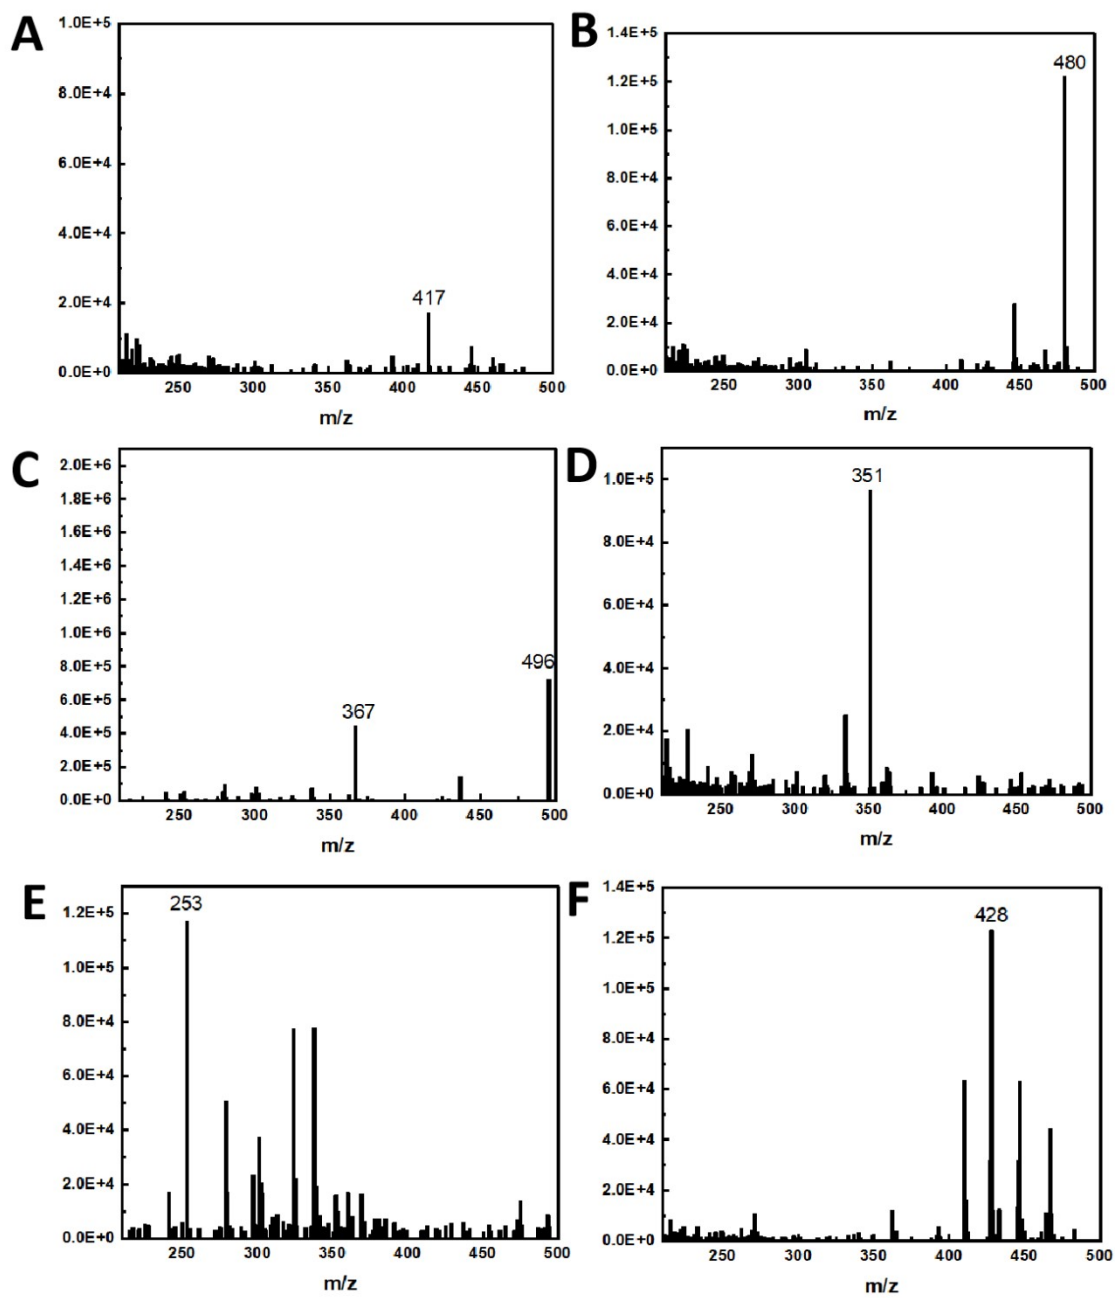

**Fig. S14** The HPLC-MS spectra of a fraction of the intermediates during tetracycline degradation.

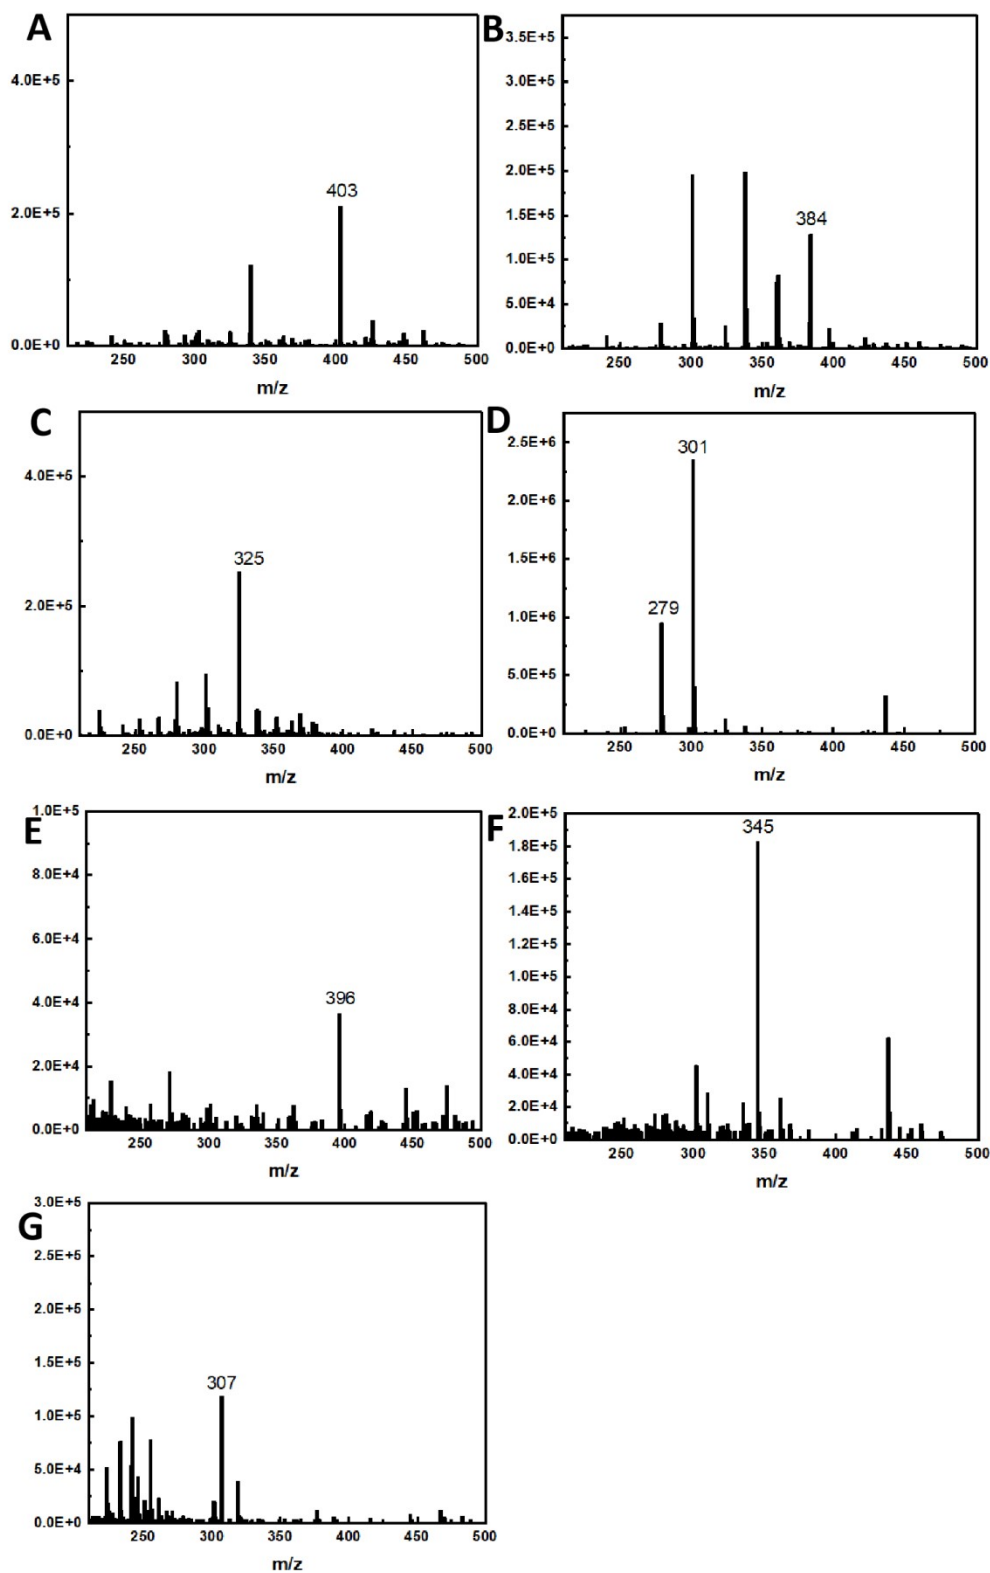

Fig. S15 The HPLC-MS spectra of the other intermediates during tetracycline degradation.

**Table S2** The intermediates in the process of tetracycline photodegradation by Cu<sub>2</sub>O/CuZnAl-LDHs.

| Formula                                                       | Molecular structure                                                                 | m/z |
|---------------------------------------------------------------|-------------------------------------------------------------------------------------|-----|
| C <sub>22</sub> H <sub>24</sub> N <sub>2</sub> O <sub>8</sub> | 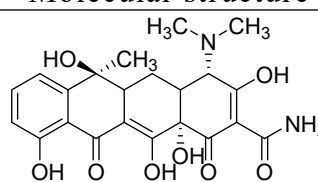   | 445 |
| C <sub>20</sub> H <sub>20</sub> N <sub>2</sub> O <sub>8</sub> |    | 417 |
| C <sub>20</sub> H <sub>17</sub> NO <sub>13</sub>              |    | 480 |
| C <sub>20</sub> H <sub>19</sub> NO <sub>14</sub>              |   | 496 |
| C <sub>15</sub> H <sub>10</sub> O <sub>11</sub>               |  | 367 |
| C <sub>14</sub> H <sub>6</sub> O <sub>11</sub>                |  | 351 |
| C <sub>10</sub> H <sub>4</sub> O <sub>8</sub>                 |  | 253 |
| C <sub>22</sub> H <sub>24</sub> N <sub>2</sub> O <sub>7</sub> |  | 428 |
| C <sub>20</sub> H <sub>22</sub> N <sub>2</sub> O <sub>7</sub> |  | 403 |
| C <sub>20</sub> H <sub>19</sub> NO <sub>7</sub>               |  | 384 |

|                    |                                                                                    |     |
|--------------------|------------------------------------------------------------------------------------|-----|
| $C_{19}H_{18}O_5$  | 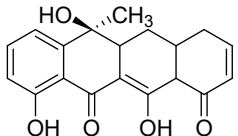  | 325 |
| $C_{17}H_{18}O_5$  |   | 301 |
| $C_{23}H_{27}NO_5$ |   | 396 |
| $C_{18}H_{18}O_7$  |   | 345 |
| $C_{15}H_{15}O_7$  |   | 307 |
| $C_{15}H_{18}O_5$  |  | 279 |

---
